# Supplementary material for: First-principles study of indium nitride monolayers doped with alkaline earth metals
Source: Royal Society of Chemistry journal article supplement (doi:10.1039/d3ra04169g), 2023-01-01
Supplement: d3ra04169g1.pdf [file d3ra04169g1.pdf]

## First-principles study of Indium nitride monolayer doped with alkaline earth metals

Duy Khanh Nguyen,<sup>1,2</sup> Chu Viet Ha,<sup>3</sup> Le T. Hong Gam,<sup>3</sup> J. Guerrero-Sanchez,<sup>4</sup> and D. M. Hoat<sup>5,6,\*</sup>

<sup>1</sup>Laboratory for Computational Physics, Institute for Computational Science and Artificial Intelligence, Van Lang University, Ho Chi Minh City, Vietnam

<sup>2</sup>Faculty of Mechanical - Electrical and Computer Engineering, School of Technology, Van Lang University, Ho Chi Minh City, Vietnam

<sup>3</sup>Faculty of Physics, TNU-University of Education, Thai Nguyen, 250000, Vietnam

<sup>4</sup>Universidad Nacional Autónoma de México, Centro de Nanociencias y Nanotecnología, Apartado Postal 14, Ensenada, Baja California, Código Postal 22800, Mexico

<sup>5</sup>Institute of Theoretical and Applied Research, Duy Tan University, Ha Noi 100000, Viet Nam

<sup>6</sup>Faculty of Natural Sciences, Duy Tan University, Da Nang 550000, Viet Nam

\*Corresponding author: [dominhhoat@duytan.edu.vn](mailto:dominhhoat@duytan.edu.vn)

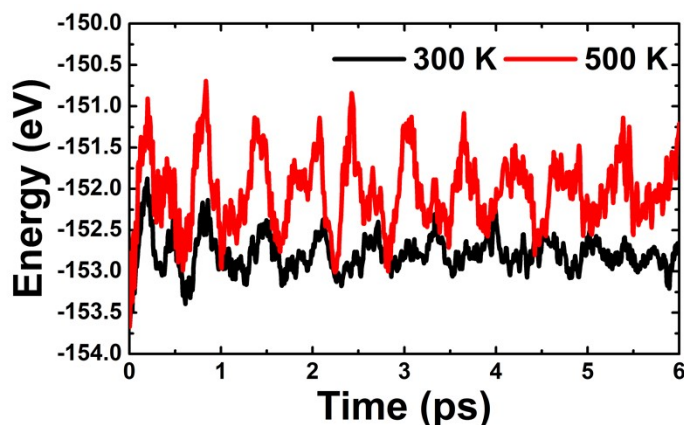

Figure S1. AIMD simulation at 300 and 500 K of InN monolayer.

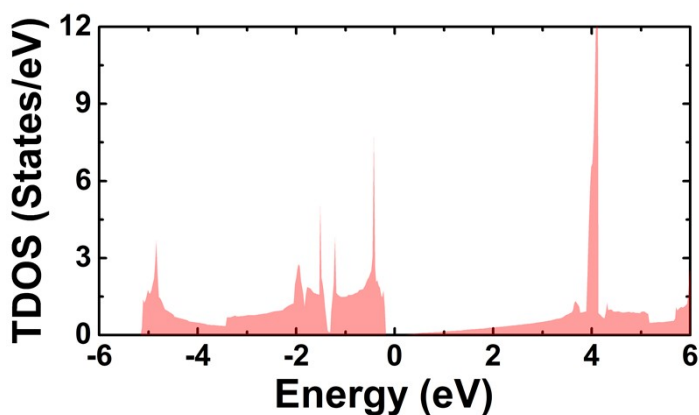

Figure S2: Total density of states of InN monolayer.

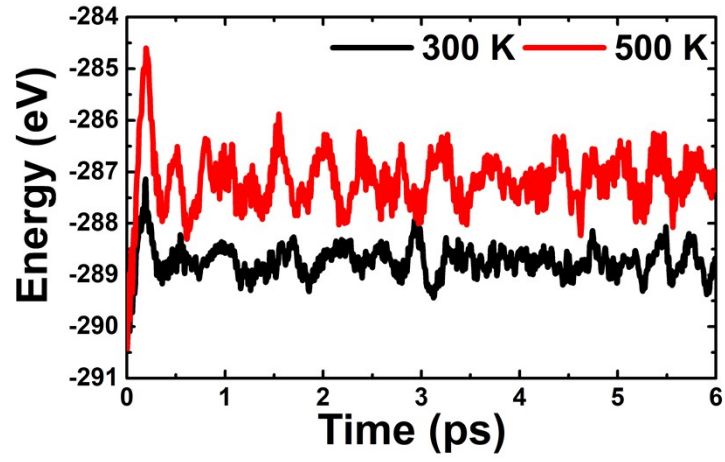

Figure S3: AIMD simulations at 300 and 500 K of InN monolayer with a single In vacancy.

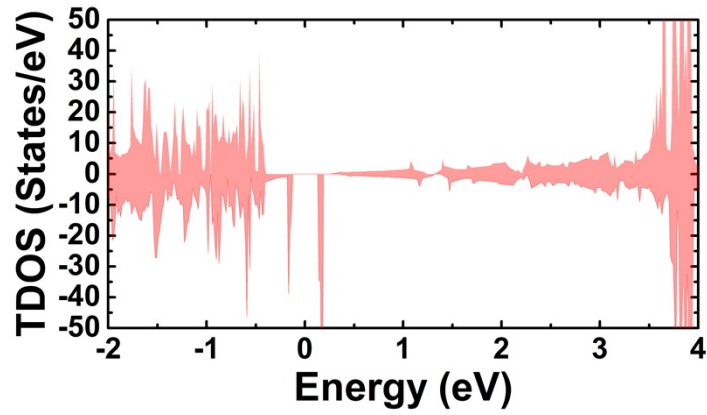

Figure S4: Total density of states of InN monolayer with a single In vacancy.

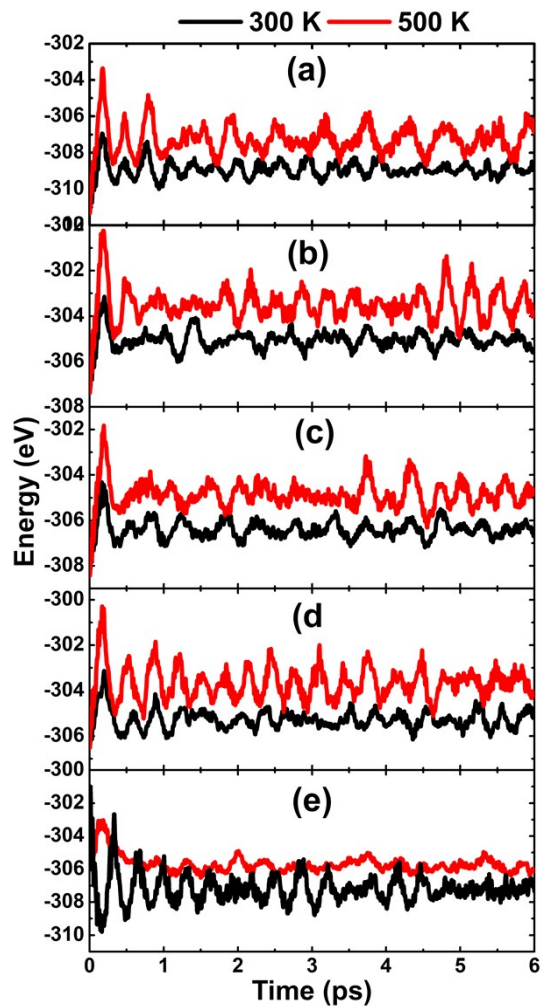

Figure S5: AIMD simulations at 300 and 500K of InN monolayer doped with (a) Be, (b) Mg, (c) Ca, (d) Sr, and (e) Ba.

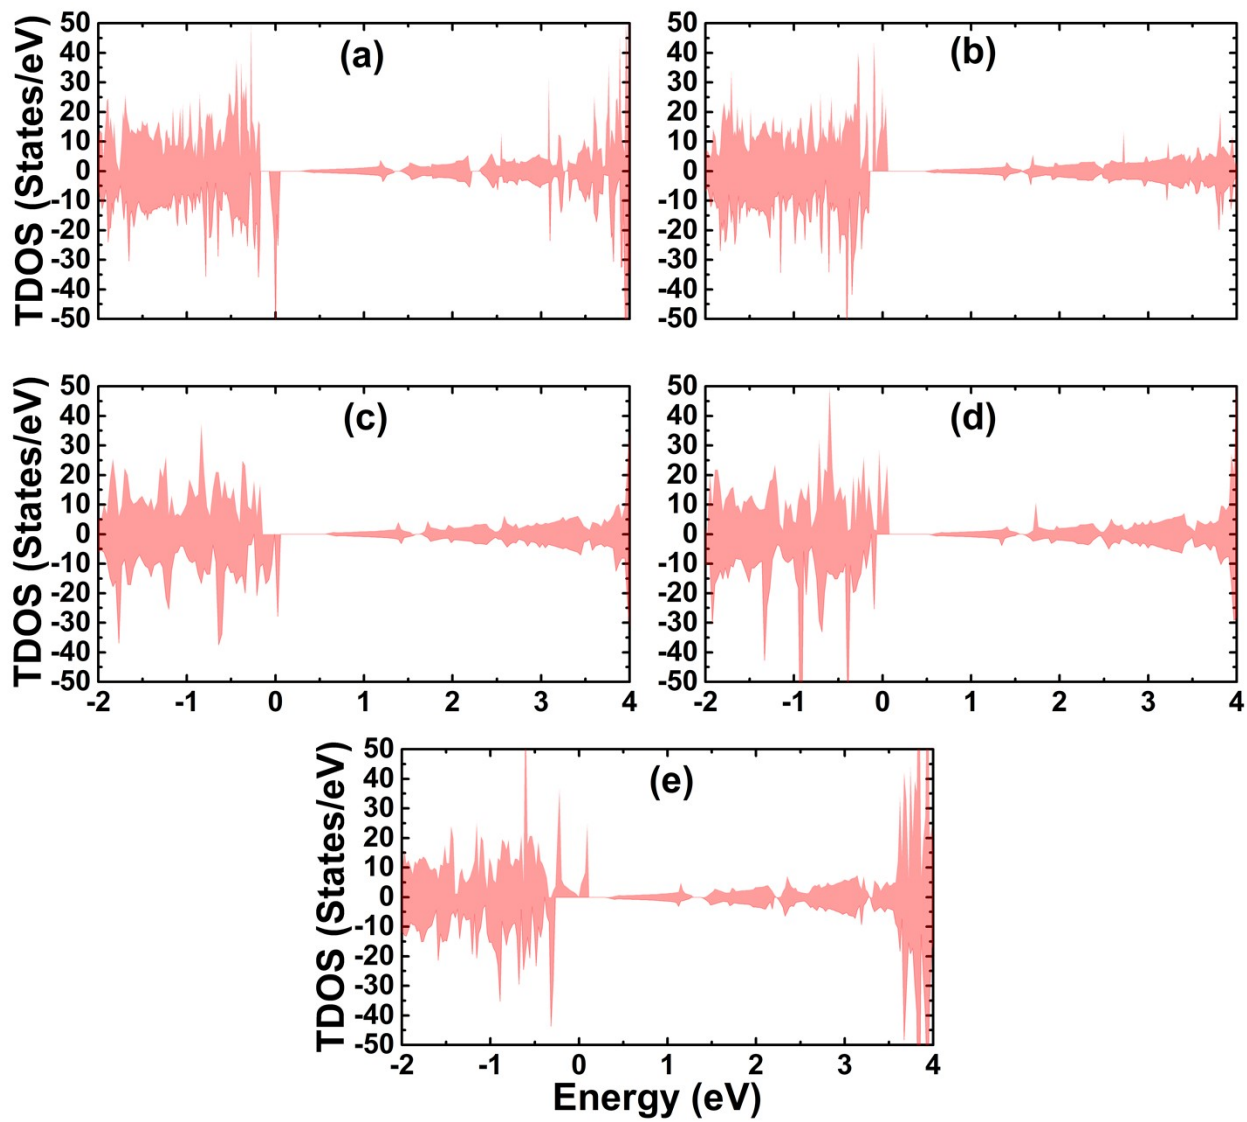

Figure S6: Total density of states of InN monolayer doped with (a) Be, (b) Mg, (c) Ca, (d) Sr, and (e) Ba.

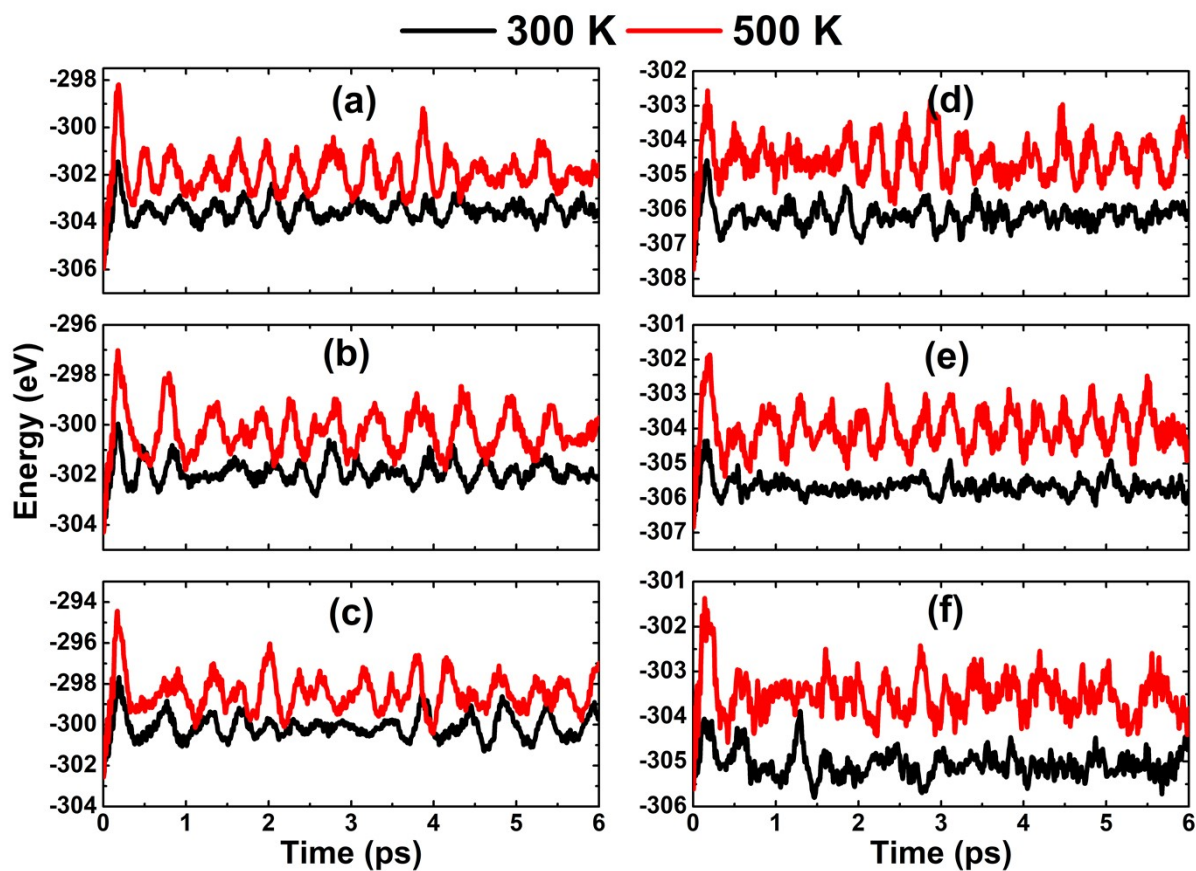

Figure S7: AIMD simulations at 300 and 500 K of InN monolayer doped with (a) 12.5%, (b) 18.75%, (c) 25% of Mg; and (d) 12.5%, (e) 18.75%, and (f) 25% of Ca.
